# Supplementary material
Source: Elsevier journal article supplement (https://www.sciencedirect.com/science/article/pii/S1134009620301194)
Supplement: mmc1 [file S1134009620301194:mmc1.docx]

**RECOMENDACIONES DE LA SOCIEDAD ESPAÑOLA DE CIRUGÍA CARDIOVASCULAR Y ENDOVASCULAR ANTE LA PANDEMIA COVID-19**

RESUMEN

Ante el contexto sanitario de Pandemia por COVID-19, la Sociedad Española de Cirugía Cardiovascular y Endovascular (SECCE) asume la obligación de elaborar y transmitir una serie de Recomendaciones que permitan asegurar una adecuada cobertura sanitaria de la población, al mismo tiempo que se minimice la exposición y el riesgo de contagio tanto de pacientes como de profesionales. Para ello, y dentro del marco global que formulan las instrucciones del Ministerio de Sanidad, Consejería de Sanidad y Direcciones-Gerencia de cada uno de los centros sanitarios, debe organizarse un plan de contingencia de los distintos servicios de Cirugía Cardiovascular. Este plan de contingencia debe mantener el correcto funcionamiento de los servicios de Cirugía Cardiovascular, asegurando el adecuado cumplimiento de las siguientes dimensiones asistenciales: a) La correcta atención de los pacientes urgentes y emergentes. b) La elaboración de una lista de pacientes preferentes y criterios temporales de tratamiento. c) La demora justificada y segura de aquellos pacientes de tratamiento electivo cuya patología y situación clínica lo permitan. d) La aplicación concreta de los programas de ECMO en el contexto COVID-19.

ABSTRACT

In the actual COVID-19 Pandemic, the Spanish Society of Cardiovascular and Endovascular Surgery (SECCE) assumes the obligation to elaborate special recommendations that ensure an adequate health care of population, while minimizing the exposure and the risk of contagion for both patients and professionals. For that reason, Cardiovascular Surgery Departments need to develop a functional plan of contingency within the global framework formulated by the instructions of the Ministry of Health and hospital authorities. The aim of this strategy is the proper functioning of Cardiovascular Surgery Departments: a) Correct care for urgent and emerging patients. b) The preparation of a list of preferred patients and temporary treatment criteria. c) The justified and safe delay of elective patients if their pathology and clinical situation allow it. d) The concrete application of ECMO programs in the COVID-19 context.

La actual situación de emergencia sanitaria, calificada por la OMS de pandemia global desde el 11 de marzo de 2020, comenzó como un brote comunitario en la ciudad de Wuhan (provincia de Hubei, China) el pasado mes de diciembre de 2019. El virus, de la familia Coronaviridae, denominado SARS-CoV-2 es causante de la enfermedad denominada por consenso internacional COVID-19.

La responsabilidad principal de la comunidad científica, de los gobiernos central y autonómicos y del sistema sanitario globalmente considerado es aislar la enfermedad y detener su propagación.

En este sentido, el especial contexto socio-sanitario de pandemia por COVID-19 hace que distintos servicios asistenciales, que no tenemos una habitual actividad sobre los pacientes con afección respiratoria, tengamos que reorganizarnos para dar una óptima asistencia sanitaria en este crítico momento.

La Sociedad Española de Cirugía Cardiovascular y Endovascular (SECCE) a propuesta de la Sociedad Andaluza de Cirugía Cardiovascular, y con el apoyo de la Sociedad Catalana de Cirugía Cardiaca, asumen la obligación de elaborar y transmitir una serie de Recomendaciones que permitan asegurar una adecuada cobertura sanitaria de la población al mismo tiempo que se minimice la exposición y el riesgo de contagio tanto de pacientes como de profesionales. Para ello, y dentro del marco global que formulan las instrucciones del Ministerio de Sanidad, Consejería de Sanidad y Direcciones-Gerencia de cada uno de los centros sanitarios, debe organizarse un plan de contingencia de los distintos servicios de Cirugía Cardiovascular.

Este plan de contingencia debe mantener el correcto funcionamiento de los servicios de Cirugía Cardiovascular, asegurando el adecuado cumplimiento de las siguientes dimensiones asistenciales:

- La correcta atención de los pacientes urgentes y emergentes.
- La elaboración de una lista de pacientes preferentes y criterios temporales de tratamiento.
- La demora justificada y segura de aquellos pacientes de tratamiento electivo cuya patología y situación clínica lo permitan.
- La aplicación concreta de los programas de ECMO en el contexto COVID-19.

El presente documento se ha elaborado en consonancia con los documentos de recomendaciones elaborados por las distintas sociedades científicas quirúrgicas y anestesiológicas de nuestro entorno, tanto nacionales e internacionales.

1. **Reorganización de los profesionales y adecuación de la estructura del Servicio de Cirugía Cardiovascular:**

- Se recomienda la división estructural del servicio en grupos de trabajo independientes, con objeto de asegurar la asistencia clínica de la población en caso de contagio a profesionales.
- Dentro de cada grupo de trabajo deberá reducirse la exposición de los profesionales organizando turnos de presencia física, en función de la carga asistencial del momento, y favoreciendo el trabajo telemático de control de pacientes, elaboración de informes clínicos, control de listas de espera, etc.
- Protección de los miembros del servicio con mayor vulnerabilidad frente al COVID-19 identificados como trabajadores especialmente sensibles (TES). Siguiendo las instrucciones de los servicios de medicina preventiva de los distintos centros se ajustará su actividad clínica a la modalidad más conveniente, facilitando la reasignación de tareas no presenciales[[1]](#footnote-1).
- La participación directa y colaboración clínica de los miembros del servicio con los grupos funcionales COVID de cada centro sanitario se llevará acabo siguiendo las instrucciones específicas de la Dirección Médica, garantizando una adecuada atención de la patología cardiovascular emergente, urgente y no demorable.
- Se realizará una vigilancia activa para identificar precozmente los contactos de riesgo de los profesionales del servicio, siguiendo las instrucciones de los servicios de medicina preventiva de cada centro hasta su resolución.
- Los profesionales que tengan contactos de riesgo con pacientes COVID-19 (+), sintomáticos o con alta sospecha diagnóstica seguirán los protocolos a tal efecto diseñados por el servicio de medicina preventiva de cada centro sanitario. Se notificará al Jefe de Servicio y a la Dirección médica del centro.

1. **Actividad de Consultas Externas de Cirugía Cardiovascular:**

- Como norma general se recomienda la suspensión temporal de las consultas de presencia física.
- Las consultas se realizarán de forma telemática, identificando a los pacientes con empeoramiento de su clase funcional y aquellos con necesidad cardioquirúrgica preferente.
- Durante la consulta telemática se pondrá énfasis en la identificación de pacientes sintomáticos para COVID-19 y se valorará el potencial impacto pronóstico en su patología de base.
- La consulta será presencial en aquellos casos en que sea totalmente necesaria una valoración directa del paciente, destacando situaciones de inestabilidad o empeoramiento progresivo, valoración y tratamiento de heridas quirúrgicas, programación no demorable de dispositivos de electroestimulación o patología vascular periférica que requiera intervención directa ambulatoria.
- La consulta presencial se realizará con una apropiada distancia de seguridad durante la entrevista, realizando las exploraciones e intervenciones estrictamente necesarias. El personal sanitario y el paciente deberán llevar mascarilla quirúrgica en todo momento. Sólo podrá acudir a la consulta 1 familiar, en caso de ser necesaria su participación como cuidador del paciente.

1. **Cirugía electiva (programada):**

- Se recomienda, en el contexto actual de pandemia COVID-19, demorar los procedimientos quirúrgicos de programación ordinaria siempre que la situación clínica de los pacientes garantice una adecuada seguridad durante el periodo de espera.
- Progresivamente, y en función de la situación de demanda asistencial de los distintos centros hospitalarios y de la disponibilidad de las unidades de cuidados intensivos, se llevarán a cabo intervenciones de cirugía electiva (programada) de pacientes preferentes, continuando tras la normalización de la situación epidemiológica y hospitalaria con el tratamiento de los demás pacientes que se encuentren en Lista de Espera Quirúrgica (LEQ).
- Para su ordenación temporal se atenderá a los criterios simplificados expuestos en el **ANEXO I** de este documento de recomendaciones.
- No deberá realizarse el tratamiento quirúrgico en programación electiva de pacientes COVID-19 (+), sintomáticos o con alta sospecha diagnóstica, si su situación clínica lo permite. Se valorará de forma individualizada en cada caso el tiempo necesario de espera.
- Por el importante potencial pronóstico del COVID-19 en los pacientes que precisan tratamiento quirúrgico cardiovascular y por la seguridad de los profesionales sanitarios, se recomienda realizar una búsqueda activa de pacientes infectados en todos los casos de cirugía electiva. Para ello se utilizará, en función de la disponibilidad de cada centro:
  - Historia clínica dirigida a identificar los casos sospechosos y contactos de riesgo.
  - Realización del test diagnóstico mediante RT-PCR de COVID-19 durante las 48 horas previas al procedimiento quirúrgico electivo. Se recomienda precaución en la valoración del test en pacientes asintomáticos debido a la limitada sensibilidad de la prueba y la posibilidad de obtener un falso negativo.
  - Realización de test rápidos, en función de su disponibilidad en los distintos centros médicos y de la valoración individual de cada paciente. De igual forma hay que ser cautos en su valoración por la alta tasa de falsos negativos, especialmente durante las primeras fases de la infección.
  - Rx de Tórax.
  - TC Tórax[[2]](#footnote-2) reciente (<24 horas).
- Si fuera necesario el tratamiento electivo de un paciente COVID-19 (+), sintomático o con alta sospecha diagnóstica, se cumplirán las instrucciones específicas de protección, circuito de paciente, quirófano, unidad de cuidados intensivos y personal disponibles en cada centro sanitario, con observación de lo dispuesto por el Ministerio de Sanidad y la Consejería de Sanidad[[3]](#footnote-3). Las recomendaciones mínimas de actuación se especifican en **Figura 1**.
- Durante la situación de pandemia por COVID-19 se recomienda[[4]](#footnote-4) de forma general la utilización, en todos los procedimientos, de equipos de protección individual (EPI) que incluyan al menos[[5]](#footnote-5) (<https://www.cdc.gov/niosh/npptl/pdfs/PPE-Sequence-508.pdf>)[[6]](#footnote-6):
  - Mascarillas FFP2[[7]](#footnote-7)/FFP3.
  - Gafas de protección de montura integral (protege de los procesos de aerosolización)
  - Pantalla de cobertura facial completa (especialmente en procedimientos en los que se produzca riesgo de salpicaduras de sangre, vómito u otros líquidos biológicos)
  - Bata impermeable.
- Deberá limitarse al mínimo imprescindible el número de profesionales dentro del quirófano, reduciéndose asimismo la circulación de personas en el entorno.
- Los pacientes deberán llevar mascarilla en todo momento hasta su intubación oro-traqueal en caso de ser necesaria.

1. **Cirugía urgente y emergente**

- Los criterios de tratamiento quirúrgico urgente/emergente se ajustarán a las guías actuales de práctica clínica, no siendo demorable de forma injustificada.
- El tratamiento quirúrgico urgente/emergente de un paciente COVID-19 (+), sintomático o con alta sospecha diagnóstica, será valorado de forma individualizada en función de su situación clínica, comorbilidades y otros factores de riesgo existentes.
- Por el importante potencial pronóstico del COVID-19 en estos casos, y por la posible presencia de pacientes asintomáticos, paucisintomáticos o con clínica enmascarada por la patología de base con COVID-19, se recomienda realizar una búsqueda activa de pacientes infectados en todos los casos mediante la utilización de:
  - Historia clínica dirigida a identificar los casos sospechosos.
  - Rx de Tórax.
  - TC Tórax reciente (<24 horas).
  - Realización del test diagnóstico mediante RT-PCR de COVID-19. La espera hasta el resultado será valorada de forma individual. No será admisible, en ningún caso, una demora injustificada del tratamiento quirúrgico emergente por la espera hasta disponer del resultado del test. Se recomienda precaución en la valoración del test en pacientes asintomáticos debido a la limitada sensibilidad de la prueba y la posibilidad de obtener un falso negativo.
  - Realización de test rápidos, en función de su disponibilidad en los distintos centros médicos y de la valoración individual de cada paciente. De igual forma hay que ser cautos en su valoración por la alta tasa de falsos negativos, especialmente durante las primeras fases de la infección, por lo que no deben indicarse de forma generalizada.
- Durante la situación de pandemia por COVID-19 se recomienda de forma general seguir las mismas directrices establecidas de protección que para los pacientes con programación electiva. Los casos sospechosos serán tratados como COVID-19 (+) a efectos de protección, circuito de pacientes, quirófano y unidad de cuidados intensivos, siguiendo las instrucciones disponibles en cada centro hospitalario.

1. **ECMO en el contexto de pandemia por COVID-19:**

Los Servicios de Cirugía Cardiovascular, en conjunción con los Servicios de Medicina Intensiva, pueden ofrecer una atención especializada de último nivel mediante la utilización de sistemas de soporte mecánico circulatorio temporal (ECMO VV y VA) en pacientes refractarios al tratamiento con SDRA grave y/o miocardiopatía debido a COVID-19:

- Se recomienda la adaptación de los programas ECMO de los distintos centros hospitalarios para su utilización prioritaria en este contexto de pandemia por COVID-19, garantizando también una adecuada atención sanitaria del área de referencia.
- Para ello, se deberán concretar de forma específica los criterios de entrada en ECMO y los criterios de exclusión/contraindicación de pacientes COVID-19 (**Figuras 2A, 2B, 2C y 2D**).
- Se recomienda limitar el mínimo necesario el número de profesionales que participen en el implante.
- Se deberá incluir al paciente en el Registro ECMO COVID-19 que la Sociedad Española de Cirugía Cardiovascular y Endovascular ha creado a tal efecto (siguiendo las instrucciones especificadas).
- La adecuación de los protocolos ECMO de los distintos centros sanitarios deberá contemplar el número de dispositivos disponibles, tanto en centros públicos como en centros privados, estableciendo un mapa de utilización de los mismos con una progresiva restricción de los criterios de entrada en función de la disponibilidad de dispositivos y resultados en los pacientes previamente tratados en el centro.

1. **Recomendaciones de Patología Cardio-quirúrgica Infantil y Cardiopatías Congénitas del Adulto:**

Durante esta fase inicial de pandemia por COVID-19 las autoridades sanitarias, respaldadas por las diferentes sociedades científicas, han establecido directrices claras de restringir al máximo la actividad de cirugía cardiaca infantil y de las cardiopatías congénitas del adulto, como parte de las medidas de distanciamiento social y organización de recursos sanitarios. Por ello, durante este periodo solo estará autorizado el tratamiento quirúrgico de los pacientes considerados urgentes y emergentes.

Progresivamente, y en función de la situación de demanda asistencial de los distintos centros hospitalarios, de la disponibilidad de recursos y del contexto epidemiológico, nos encontraremos en un escenario diferente, en el que tendremos que ampliar el espectro de intervenciones de cirugía cardiaca infantil para dar respuesta a las necesidades de la población.

En este sentido es importante tener en cuenta lo siguiente:

1. Los niños y adolescentes constituyen un grupo de población en los que la enfermedad del COVID-19 ha demostrado tener escasa repercusión. Son excepcionales los pacientes que desarrollan un cuadro clínico de gravedad y la inmensa mayoría se presentaran con síntomas catarrales leves o incluso asintomáticos. De esto se derivan dos importantes consideraciones:

- La presión asistencial en los hospitales pediátricos que no han sido destinados para el tratamiento de adultos es menos intensa que en los hospitales generales. Hecho que se extiende a las Unidades de Cuidados Intensivos Pediátricos y Neonatología.
- Cada vez existen mayores evidencias de que este grupo de población puede constituir un importante reservorio y fuente de contagio de la enfermedad, precisamente por el numeroso porcentaje de pacientes paucintomáticos o asintomáticos y que potencialmente pueden ser vector de contagio.

1. No existe aún evidencia suficiente que indique qué cardiopatías congénitas o contextos clínicos de pacientes pediátricos, a diferencia de las cardiopatías adquiridas del adulto, constituyen un factor de riesgo aumentado para la enfermedad del COVID-19. No obstante es imaginable que lo constituyan aquellas patologías en las que pueda existir una repercusión hemodinámica significativa.

Partiendo de estas consideraciones previas estimamos conveniente realizar las siguientes recomendaciones:

- Pasada la fase de inicial de pandemia por COVID-19, y en función de la situación específica de cada hospital y el contexto epidemiológico, la actividad de cirugía cardiaca infantil podría reanudarse parcial o totalmente.
- La priorización de pacientes se hará ciñéndose a los criterios estándar habituales, en función de la sintomatología y del tipo de patología y sus tiempos quirúrgicos específicos según la edad del paciente.
- Recomendamos realizar los test para la detección de coronavirus antes de la intervención a todos los pacientes, tanto urgentes como programados. A este respecto hay que reseñar que incluso en hospitales con un mayor volumen de actividad, el número de pacientes en términos absolutos es bastante reducido (cifras promedio en nuestro país en torno a 90-100 casos anuales).
- Los pacientes con test positivo serán demorados para su intervención hasta la negativización del mismo (al menos dos semanas), siempre atendiendo a una evaluación individualizada y situación clínica.
- En aquellos pacientes urgentes donde no sea posible esperar, o en los que no se haya podido realizar el cribado de coronavirus por motivos de la urgencia en el tratamiento, se realizara la intervención ciñéndose a los estándares definidos de cirugía sobre pacientes COVID-19, expuesto previamente.
- Durante la situación de pandemia por COVID-19 se recomienda[[8]](#footnote-8) de forma general la utilización, en todos los procedimientos, de equipos de protección individual (EPI) que incluyan al menos[[9]](#footnote-9) (<https://www.cdc.gov/niosh/npptl/pdfs/PPE-Sequence-508.pdf>)[[10]](#footnote-10):
  - Mascarillas FFP2[[11]](#footnote-11)/FFP3.
  - Gafas de protección de montura integral (protege de los procesos de aerosolización)
  - Pantalla de cobertura facial completa (especialmente en procedimientos en los que se produzca riesgo de salpicaduras de sangre, vómito u otros líquidos biológicos)
  - Bata impermeable.

Por su parte, **los pacientes Adultos con Cardiopatías Congénitas** constituyen un grupo heterogéneo, de edades y situaciones clínicas muy diferentes, y con patologías cardiovasculares también muy variadas. Estos pacientes han de ser estudiados y analizados individualmente por los grupos multidisciplinares de las Unidades de Cardiopatías Congénitas del Adulto.

Estos pacientes se ceñirán a los estándares definidos en el presente documento para los pacientes adultos (incluyendo realización de test de detección de coronavirus, pruebas de imagen, etc).

Las recomendaciones para intervenir quirúrgicamente son:

- Los casos que sean considerados urgentes o emergentes dentro de los plazos definidos de urgencia o emergencia quirúrgica.
- Se intervendrán en el plazo máximo de 1 mes aquellos que sean catalogados como alta prioridad por el equipo médico multidisciplinar de las Unidades de Cardiopatías Congénitas del Adulto.
- Aquellos otros considerados como prioridad intermedia se intervendrán en un plazo máximo de 3 meses.
- El resto de pacientes, considerados no prioritarios, podrán esperar hasta la resolución completa de la situación de pandemia actual.

**Bibliografía utilizada:**

1. Adams JG and Walls RM. Supporting the Health Care Workforce During the COVID-19 Global Epidemic. [JAMA.](https://www.ncbi.nlm.nih.gov/pubmed/?term=Supporting+the+Health+Care+Workforce+During+the+COVID-19+Global+Epidemic) 2020 Mar 12. doi: 10.1001/jama.2020.3972. [Epub ahead of print].
2. ACTACC Guidance of procedures on patients with COVID-19. <https://www.actacc.org/guidance-procedures-patients-covid-19>
3. American College of Sugery. COVID-19 Guidelines for Triage of Cardiac Surgery Patients. <https://www.facs.org/covid-19/clinical-guidance/elective-case/cardiac-surgery>
4. Badia JM, et al. Surgical protocol for confirmed or suspected cases of Ebola and other highly transmissible diseases. [Cir Esp.](https://www.ncbi.nlm.nih.gov/pubmed/26190811) 2016 Jan;94(1):11-5. doi: 10.1016/j.ciresp.2015.05.013. Epub 2015 Jul 17.
5. Cardiothoracic Surgeons in Pandemics: Ethical Considerations. <https://www.ctsnet.org/article/cardiothoracic-surgeons-pandemics-ethical-considerations>
6. Chen N, et al. Epidemiological and clinical characteristics of 99 cases of 2019 novel coronavirus pneumonia in Wuhan, China: a descriptive study. [Lancet.](https://www.ncbi.nlm.nih.gov/pubmed/?term=Epidemiological+and+clinical+characteristics+of+99+cases+of+2019+novel+coronavirus+pneumonia+in+Wuhan%2C+China%3A+a+descriptive+study) 2020 Feb 15;395(10223):507-513. doi: 10.1016/S0140-6736(20)30211-7. Epub 2020 Jan 30.
7. Clinical guide for the management of vascular patients during the Coronavirus pandemic. NHS. 20/03/2020.
8. <https://www.england.nhs.uk/coronavirus/wp-content/uploads/sites/52/2020/03/specialty-guide-management-of-vascular-surgery-patients-v1-20-march-2020.pdf>
9. COVID-19 Guidelines for Triage of Vascular Surgery Patients. American College of Surgeons. 24/03/2020.
10. <https://www.facs.org/covid-19/clinical-guidance/elective-case/vascular-surgery>
11. COVID-19: the US Perspective - Society of Thoracic Surgeons
12. <https://www.sts.org/publications/news-surgeons-view/covid-19-us-perspective>
13. COVID-19 STS Resources. <https://www.sts.org/covid-19/covid-19-resources>
14. COVID-19 virus and vascular surgery. Vascular Society. 27/03/2020.
15. <https://www.vascularsociety.org.uk/_userfiles/pages/files/Newsletters/2020/Presidents%20update%2027_03_20.pdf>
16. Criterios de ordenación temporal de las intervenciones quirúrgicas en patología cardiovascular. Documento oficial de la Sociedad Española de Cardiología y de la Sociedad Española de Cirugía Cardiovascular. Rev Esp Cardiol 2000; 53: 1373-1379.
17. Devereaux AV, et al. Definitive care for the critically ill during a disaster: a framework for allocation of scarce resources in mass critical care: from a Task Force for Mass Critical Care summit meeting, January 26–27, 2007, Chicago, IL. Chest 2008;133:51S-66S.
18. Driggin E, et al. Cardiovascular Considerations for Patients, Health Care Workers, and Health Systems During the Coronavirus Disease 2019 (COVID-19) Pandemic. J Am Coll Cardiol. 2020 Mar 18. pii: S0735-1097(20)34637-4. doi: 10.1016/j.jacc.2020.03.031. [Epub ahead of print].
19. ECMO in COVID-19 (ELSO) <https://www.elso.org/Registry/FullCOVID19RegistryDashboard.aspx>
20. Grenland JR, etal. [COVID-19 infections: Implications for perioperative and Critical Care Physicians](https://anesthesiology.pubs.asahq.org/article.aspx?articleid=2763458). [Anesthesiology.](https://www.ncbi.nlm.nih.gov/pubmed/?term=COVID-19+infections%3A+Implications+for+perioperative+and+Critical+Care+Physicians) 2020 Mar 27. doi: 10.1097/ALN.0000000000003303. [Epub ahead of print].
21. Gobierno de España. Enfermedad por nuevo coronavirus, COVID-19. Situación actual <https://www.mscbs.gob.es/profesionales/saludPublica/ccayes/alertasActual/nCov-China/home.htm>
22. Gobierno de España. Ministerio de Sanidad. Dirección General de salud pública, calidad e innovación. Centro de Coordinación de Alertas y Emergencias Sanitarias. Procedimiento de Actuación frente a casos de Infección por el nuevo coronavirus (SARS-CoV-2), actualizado a 31 de marzo de 2020 <https://www.mscbs.gob.es/profesionales/saludPublica/ccayes/alertasActual/nCov-China/documentos/Procedimiento_COVID_19.pdf>
23. Gao J, et al. Breakthrough: Chloroquine phosphate has shown apparent efficacy in treatment of COVID-19 associated pneumonia in clinical studies. [Biosci Trends.](https://www.ncbi.nlm.nih.gov/pubmed/?term=%3A+Chloroquine+phosphate+has+shown+apparent+efficacy+in+treatment+of+COVID-19+associated+pneumonia+in+clinical+studies) 2020 Mar 16;14(1):72-73. doi: 10.5582/bst.2020.01047. Epub 2020 Feb 19.
24. Guan WJ et al. China Medical Treatment Expert Group for Covid-19. Clinical Characteristics of Coronavirus Disease 2019 in China. [N Engl J Med.](https://www.ncbi.nlm.nih.gov/pubmed/?term=China+Medical+Treatment+Expert+Group+for+Covid-19.+Clinical+Characteristics+of+Coronavirus+Disease+2019+in+China) 2020 Feb 28. doi: 10.1056/NEJMoa2002032. [Epub ahead of print].
25. Guías de Práctica Clínicas SEC. <https://secardiologia.es/cientifico/guias-clinicas>Halpern N, Tan KS, Society of Critical Care Medicine Ventilator Taskforce. United States Resource Availability for COVID-19. Available <https://sccm.org/Blog/March-2020/United-States-Resource-Availability-for> Actualizado 20 de Marzo, 2020.
26. He H, et al. [Anesthetic Management of Patients Undergoing Aortic Dissection Repair With Suspected Severe Acute Respiratory Syndrome Coronavirus-2 Infection](https://www.ncbi.nlm.nih.gov/pmc/articles/PMC7102517/) – J Cardiothorac Vasc Anesth. [J Cardiothorac Vasc Anesth.](https://www.ncbi.nlm.nih.gov/pubmed/?term=Anesthetic+Management+of+Patients+Undergoing+Aortic+Dissection+Repair+With+Suspected+Severe+Acute+Respiratory+Syndrome+Coronavirus-2+Infection) 2020 Mar 16. pii: S1053-0770(20)30270-6. doi: 10.1053/j.jvca.2020.03.021. [Epub ahead of print]
27. Hu H, et al. Coronavirus fulminant myocarditis saved with glucocorticoid and human immunoglobulin. [Eur Heart J.](https://www.ncbi.nlm.nih.gov/pubmed/?term=Coronavirus+fulminant+myocarditis+saved+with+glucocorticoid+and+human+immunoglobulin) 2020 Mar 16. pii: ehaa190. doi: 10.1093/eurheartj/ehaa190. [Epub ahead of print].
28. Huang Q, Herrmann A. Fast assessment of human receptor-binding capability of 2019 novel coronavirus (2019-nCoV). Posted online February 04, 2020. bioRxiv 930537. DOI: 10.1101/2020.02.01.930537 (preprint).
29. Xu Z, et al. Pathological findings of COVID-19 associated with acute respiratory distress syndrome. [Lancet Respir Med.](https://www.ncbi.nlm.nih.gov/pubmed/32085846) 2020 Apr;8(4):420-422. doi: 10.1016/S2213-2600(20)30076-X. Epub 2020 Feb 18.
30. Kinlaw K, ey al. Ethical guidelines in pandemic influenza: recommendations of the Ethics Subcommittee of the Advisory Committee of the Director, Centers for Disease Control and Prevention. Disaster Med Public Health Prep 2009;3:S185-S192.
31. Maisano F and Matt P. Cardiac Surgery and the COVID-19 outbreak: what does it mean?
32. <https://www.pcronline.com/News/Whats-new-on-PCRonline/2020/Cardiac-Surgery-and-the-COVID-19-outbreak-what-does-it-mean>
33. Ong SWX, et al. Air, Surface Environmental, and Personal Protective Equipment Contamination by Severe Acute Respiratory Syndrome Coronavirus 2 (SARS-CoV-2) From a Symptomatic Patient. [JAMA.](https://www.ncbi.nlm.nih.gov/pubmed/?term=Surface+Environmental%2C+and+Personal+Protective+Equipment+Contamination+by+Severe+Acute+Respiratory+Syndrome+Coronavirus+2+(SARS-CoV-2)+From+a+Symptomatic+Patient) 2020 Mar 4. doi: 10.1001/jama.2020.3227. [Epub ahead of print].
34. Park SY, et al. Postexposure prophylaxis for Middle East respiratory syndrome in healthcare workers. [J Hosp Infect.](https://www.ncbi.nlm.nih.gov/pubmed/30240813) 2019 Jan;101(1):42-46. doi: 10.1016/j.jhin.2018.09.005. Epub 2018 Sep 18.
35. Pisano A, et al. [Protecting High-Risk Cardiac Patients During the COVID-19 Outbreak](https://www.jcvaonline.com/article/S1053-0770(20)30293-7/pdf). [J Cardiothorac Vasc Anesth.](https://www.ncbi.nlm.nih.gov/pubmed/?term=Protecting+High-Risk+Cardiac+Patients+During+the+COVID-19+Outbreak) 2020 Mar 27. pii: S1053-0770(20)30293-7. doi: 10.1053/j.jvca.2020.03.043. [Epub ahead of print].
36. [Recomendaciones generales en caso de intervención quirúrgica en el contexto de la pandemia por COVID-19](https://www.aecirujanos.es/files/noticias/152/documentos/Manejo_quirurgico_v2(1).pdf). AEC

<https://www.aecirujanos.es/files/noticias/152/documentos/Manejo_quirurgico_v2(1).pdf>

1. Recomendaciones de actuación en las unidades de radiología vascular intervencionista (rvi) durante el brote de coronavirus (covid-19). Documento de consenso de la Sociedad Española de Radiología Vascular e Intervencionista (SERVEI). <https://servei.org/wp-content/uploads/Recomendaciones-de-Actuacion-en-unidades-RVI-durante-brote-de-COVID-19.pdf>
2. Royale College of Surgery (UK) Updated Intercollegiate General Surgery Guidance on COVID-19. <https://www.rcseng.ac.uk/coronavirus/joint-guidance-for-surgeons-v2/>
3. Romaguera R, et al. Consideraciones sobre el abordaje invasivo de la cardiopatia isquemica y estructural durante el brote de coronavirus COVID-19. *REC Interv Cardiol*. 2020. https://doi.org/10.24875/RECIC.M20000119.
4. Romaguera R, et al. Consensus document of the Interventional Cardiology and Heart Rhythm Associations of the Spanish Society of Cardiology on the management of invasive cardiac procedure rooms during the COVID-19 coronavirus outbreak. *REC Interv Cardiol*. 2020. https://doi.org/10.24875/RECICE.M20000116.
5. Rubin EJ, et al. Audio Interview: What Clinicians Need to Know in Diagnosing and Treating Covid-19. [N Engl J Med.](https://www.ncbi.nlm.nih.gov/pubmed/?term=Audio+Interview%3A+What+Clinicians+Need+to+Know+in+Diagnosing+and+Treating+Covid-19) 2020 Mar 5;382(10):e19. doi: 10.1056/NEJMe2004244.
6. Sequence for putting on and removing Personal Protective Equipment (PPE) Centers for Disease Control (CDC) <https://www.cdc.gov/hai/prevent/ppe.html> <https://www.cdc.gov/niosh/npptl/pdfs/PPE-Sequence-508.pdf>
7. Surgical Care and Coronavirus Disease 2019 (COVID-19). American College of Surgeons <https://www.facs.org/about-acs/covid-19/information-for-surgeons>Surgery for Aortic Dilatation in Patients With Bicuspid Aortic Valves: A Statement of Clarification From the American College of Cardiology/American Heart Association Task Force on Clinical Practice Guidelines. [Circulation.](https://www.ncbi.nlm.nih.gov/pubmed/26637530) 2016 Feb 16;133(7):680-6. doi: 10.1161/CIR.0000000000000331. Epub 2015 Dec 4.
8. [SCTS/ACTACC/SCPS guidance to UK cardiac and thoracic teams for procedures on patients with COVID-19](file:///C:\Users\mendezt\AppData\Local\Microsoft\Windows\INetCache\IE\K8U7BU6F\SCTS\ACTACC\SCPS%20guidance%20to%20UK%20cardiac%20and%20thoracic%20teams%20for%20procedures%20on%20patients%20with%20COVID-19). <https://scts.org/wp-content/uploads/2020/03/SCTS-ACTACC-SCPS-Theatre-COVID-pathway-Final.pdf>
9. Ti LK, et al. What we do when a COVID-19 patient needs an operation: operating room preparation and guidance. [Can J Anaesth.](https://www.ncbi.nlm.nih.gov/pubmed/?term=What+we+do+when+a+COVID-19+patient+needs+an+operation%3A+operating+room+preparation+and+guidance) 2020 Mar 6. doi: 10.1007/s12630-020-01617-4. [Epub ahead of print].
10. Ventilator Document Workgroup. Ethical Considerations for Decision Making Regarding Allocation of Mechanical Ventilators During a Severe Influenza Pandemic or Other Public Health Emergency. Centers for Disease Control and Prevention, Ethics Subcommittee of the Advisory Committee to the Director, 2011. <https://www.cdc.gov/about/advisory/pdf/VentDocument_Release.pdf>
11. Wadhera RK, et al. Is the "sterile cockpit" concept applicable to cardiovascular surgery critical intervals or critical events? The impact of protocol-driven communication during cardiopulmonary bypass. J Thorac Cardiovasc Surg 2010;139:312-9.
12. Wang D et al. Clinical characteristics of 138 hospitalized patients with 2019 novel coronavirus–infected pneumonia in Wuhan, China. [JAMA.](https://www.ncbi.nlm.nih.gov/pubmed?term=10.1001%2Fjama.2020.1585) 2020 Feb 7. doi: 10.1001/jama.2020.1585. [Epub ahead of print].
13. Wong J, et al. [Preparing for a COVID-19 pandemic: a review of operating room outbreak response measures in a large tertiary hospital in Singapore](https://link.springer.com/article/10.1007/s12630-020-01620-9). [Can J Anaesth.](https://www.ncbi.nlm.nih.gov/pubmed/?term=Preparing+for+a+COVID-19+pandemic%3A+a+review+of+operating+room+outbreak+response+measures+in+a+large+tertiary+hospital+in+Singapore) 2020 Mar 11. doi: 10.1007/s12630-020-01620-9. [Epub ahead of print]
14. Yao TT, et al. A systematic review of lopinavir therapy for SARS coronavirus and MERS coronavirus-A possible reference for coronavirus disease-19 treatment option. [J Med Virol.](https://www.ncbi.nlm.nih.gov/pubmed/?term=A+systematic+review+of+lopinavir+therapy+for+SARS+coronavirus+and+MERS+coronavirus-A+possible+reference+for+coronavirus+disease-19+treatment+option) 2020 Feb 27. doi: 10.1002/jmv.25729. [Epub ahead of print]
15. Zheng YY, et al. COVID-19 and the cardiovascular system [Nat Rev Cardiol.](https://www.ncbi.nlm.nih.gov/pubmed/32139904) 2020 Mar 5. doi: 10.1038/s41569-020-0360-5. [Epub ahead of print].
16. [2014 ESC Guidelines on the Diagnosis and Treatment of Aortic Diseases](http://eurheartj.oxfordjournals.org/content/ehj/35/41/2873.full.pdf). Eur Heart J (2014) doi: 10.1093/eurheartj/ehu281
17. 2017 ESC/EACTS Guidelines for the Management of Valvular Heart Disease. [Eur J Cardiothorac Surg.](https://www.ncbi.nlm.nih.gov/pubmed/29156023) 2017 Oct 1;52(4):616-664. doi: 10.1093/ejcts/ezx324.
18. [2018 ESC/EACTS Guidelines on myocardial revascularization](https://academic.oup.com/eurheartj/article/40/2/87/5079120). [Eur J Cardiothorac Surg.](https://www.ncbi.nlm.nih.gov/pubmed/30165632) 2019 Jan 1;55(1):4-90. doi: 10.1093/ejcts/ezy289.

**Figuras:**

**Figura 1:** Representación esquemática del flujo de pacientes COVID-19 (+) y organización del trabajo durante el proceso quirúrgico (modificado de Ti LK, et al. Can J Anesth 2020).

**Figura 2A:** Criterios de Activación y Contraindicaciones del Código ECMO COVID-19.

**Figura 2B, 2B y 2C**: Representación esquemática de la metodología de trabajo y flujo de profesionales durante el implante ECMO COVID-19.

**ANEXO I: CRITERIOS DE ORDENACIÓN TEMPORAL PARA INTERVENCIONES**

**DE CIRUGÍA CARDIOVASCULAR EN EL CONTEXTO DE PANDEMIA COVID-19**

El presente documento constituye una modificación transitoria, en el actual contexto de pandemia por COVID-19, de los criterios de ordenación temporal de las intervenciones quirúrgicas en patología cardiovascular[[12]](#footnote-12). Las recomendaciones que se exponen a continuación configuran líneas generales de actuación, contemplando las patologías cardiovasculares más frecuentes. Y estas recomendaciones lo dejaran de ser en el momento en que pierda vigencia el presente estado de alarma sanitaria, publicado en el Real Decreto 463/2020, de 14 de marzo 2, o, en su caso, las prórrogas del mismo.

En este marco, estas recomendaciones de la Sociedad Española de Cirugía Cardiovascular y Endovascular, Sociedad Andaluza de Cirugía Cardiovascular, y Sociedad Catalana de Cirugía Cardiaca, se encuadran en la acción decidida para proteger la salud y seguridad de los pacientes quirúrgicos cardiovasculares, colaborar con el sistema sanitario en la contención y progresión de la pandemia y reforzar el sistema de salud pública.

La priorización o demora en la ordenación temporal de las intervenciones quirúrgicas en patología cardiovascular quedan sujetas a la disponibilidad de recursos, a la evaluación clínica especializada de los pacientes por parte de los médicos especialistas en cirugía cardiovascular, a la evolución de la situación epidemiológica y a las directrices y normativa de las autoridades sanitarias competentes, en especial las trasmitidas a los respectivos Servicios de cirugía Cardiovascular por Direcciones-Gerencia de los centros sanitarios. Como norma este documento está sujeto a las instrucciones declaradas por las autoridades competentes en el Real Decreto 463/2020, de 14 de marzo 2, por el que se declara el estado de alarma para la gestión de la situación de crisis sanitaria ocasionada por el COVID-19, y a las posteriores instrucciones que pudieran ser dispuestas.

**DEFINICIONES OPERATIVAS**

**Cirugía prioritaria:**

- Cirugía emergente: aquella que obliga a realizarse fuera del horario habitual, o a cambiar el parte de programación del día siguiente. El tratamiento quirúrgico se realiza durante las primeras 24 horas del ingreso hospitalario.
- Cirugía urgente: aquella cirugía que se realiza durante el mismo ingreso hospitalario motivado por la inestabilización/empeoramiento del paciente.
- Cirugía preferente: aquella que se realiza en menos de 14 días tras el alta del paciente o desde su evaluación en consulta.

**Cirugía electiva:**

- Cirugía en < de 1 meses.
- Cirugía en < de 3 meses.
- Cirugía en < de 6 meses.
- Otros plazos temporales.

**PATOLOGÍAS CARDIOVASCULARES ESPECÍFICAS**

1. **PATOLOGÍA CARDIACA Y DE GRANDES VASOS:**
2. **Cardiopatía isquémica:**

- **Paciente inestable:** Emergente/Urgente (si es factible se valorará resolución mediante ICP).
- **Paciente estable:**
  - - Tronco crítico: Urgente.
    - Tronco + derecha: Urgente.
    - Tronco: < 1mes.
    - Multivaso coronario FEVI disminuida: <1 meses.
    - Multivaso coronario FEVI normal: < 3 meses.

1. **Estenosis valvular aórtica:**

- Insuficiencia cardíaca: Urgente.
- EAo crítica: <1 mes.
- EAo y FEVI baja: <1 mes.
- EAo angina /sincope: <3 meses.

1. **Insuficiencia valvular aórtica**

- IAo con FEVI conservada: <3 meses.
- IAo con FEVI disminuida: <1 mes.
- Insuficiencia cardíaca: Urgente.

1. **Estenosis mitral:**

- Insuficiencia cardíaca descompensada: Urgente.
- Clase funcional III-IV: <1 mes.
- Clase funcional II: <3 meses.

1. **Insuficiencia mitral:**

- Insuficiencia cardíaca descompensada: Urgente.
- FEVI deprimida: <1 mes.
- FEVI normal: <3 meses.

1. **Polivalvulares:**

- Se utilizará como guía la patología valvular predominante, valorándose la posibilidad de ser un grado más estricto por ser polivalvular.

1. **Endocarditis:**

- Se seguirán las actuales guías de práctica clínica, utilizando para planificar su prioridad, criterios clínicos, infectológicos y de imagen.

1. **Patología aneurismática de Aorta Torácica:**

- En pacientes asintomáticos cuya indicación primaria es la dilatación aneurismática de la aorta ascendente:
  - > 55[[13]](#footnote-13) mm. y ≤ 60 mm: < 3 meses.
  - > 60 mm. y ≤ 70 mm: < 1 mes.
  - > 70 mm. o rápido crecimiento: Urgente.
- En pacientes asintomáticos cuya indicación primaria es la dilatación aneurismática de arco aórtico y/o aorta ascendente se deberá realizar una evaluación individualizada de cada caso.
- Pacientes sintomáticos: Emergente/Urgente.

1. **Patología Aneurismática de Aorta Abdominal:**

- Rotos o sintomáticos: Emergente/Urgente (se seguirán las actuales guías de práctica clínica).
- Infeccioso o asociados con infección de un injerto: Urgente.
- Aorta Abdominal 55 mm-70 mm: < 3 mes.
- Aorta Abdominal > 70 mm: 1 < mes.

1. **Síndrome aórtico agudo:**

- Se seguirán las actuales guías de práctica clínica: Emergente/Urgente

1. **Tumores:**

- Si alta sospecha de mixoma, asintomático y bajo riesgo embolígeno: < 3 meses
- Resto de tumores cardiacos: < 1 mes.

1. **Comunicación interauricular**:

- Asintomático: < 9 meses.
- Sintomático: < 3 meses.

1. **Pericarditis constrictiva:**

- Clase funcional III-IV: < 1 mes.
- Clase funcional II: < 3 meses.

1. **Miocardiopatía Hipertrófica Obstructiva**

- Clase funcional III-IV: < 1 mes.
- Clase funcional II: < 3 meses.

1. **IMPLANTE DE DISPOSITIVOS DE ELECTROESTIMULACIÓN Y PROCEDIMIENTOS DE EXTRACCIÓN** (Recomendaciones simplificadas. Valoración en conjunción con las Unidades de Arritmias y Medicina Infecciosas de cada centro hospitalario).
2. **BAV:**

- Sintomático: Urgente.
- Asintomático: < 1 mes.

1. **Extracción de Electrodos y Dispositivos de Electroestimulación:**

- Infección sistémica: Urgente.
- Infección local con decúbito: < 1 mes.

1. **DAI:**

- Prevención Secundaria: < 1 mes (se recomienda realizar una valoración individualizada en cada paciente en conjunción con la Unidad de Arritmias de cada centro sanitario).
- Prevención Primaria: < 3 meses (se recomienda realizar una valoración individualizada en cada paciente en conjunción con la Unidad de Arritmias de cada centro sanitario).

1. **TRC:**

- Se recomienda realizar una valoración individualizada en cada paciente, en función de su clase funcional, tasa de reingresos hospitalarios por insuficiencia cardiaca, necesidad de terapia DAI concomitante, en conjunción con la Unidad de Arritmias e Insuficiencia Cardiaca de cada centro sanitario.

1. **PATOLOGÍA VASCULAR PERIFÉRICA**

- Los pacientes pueden pasar de la calificación de electivos a urgente o emergente en función del tiempo de demora o cambios en su situación clínica.

1. **Aneurismas de Arterias Intra-Abdominales:**

- Aneurismas no aórticos intra-abdominales rotos: Emergente.
- Aneurismas no aórticos intra-abdominales con calibre superior a 3 veces su diámetro medio normal: < 1 mes.

1. **Aneurismas Periféricos:**

- Sintomáticos: Emergente/Urgente.
- Asintomáticos: < 3 meses.
- Pseudoaneurismas complejos/rápidamente expansivos, no candidatos a inyección de trombina o compresión: Urgente.

1. **Complicaciones de injertos o prótesis:**

- Infección: Se seguirán las actuales guías de práctica clínica, utilizando para planificar su prioridad, criterios clínicos, infectológicos y de imagen, en función de la situación clínica del paciente (sepsis/shock hemorrágico/ruptura del injerto o anastomosis).
- Reestenosis sintomática de una intervención previa: Urgente.
- Reestenosis asintomática de una intervención previa: < 3 meses, en función de la situación clínica del paciente.

1. **Carótidas:**

- Estenosis sintomática progresiva (AIT en progresión): Urgente.
- Estenosis sintomática (ACV/AIT): Urgente.
- Estenosis asintomática: < 3 meses.

1. **Diálisis:**

- Trombosis, Ulceración, Infección o disfunción de acceso para hemodiálisis: Urgente.
- Fallo renal con necesidad de acceso para hemodiálisis: < 1 mes.
- Síndrome de robo arterial por fístula de hemodiálisis con isquemia crítica: Urgente.
- Síndrome de robo arterial por fístula de hemodiálisis sin isquemia crítica: < 3 meses.
- Creación de fístula arterio-venosa/inserción de catéter para hemodiálisis: < 3 meses.

1. **Mesentérica:**

- Enfermedad mesentérica oclusiva aguda sintomática: Emergente/Urgente.
- Isquemia mesentérica crónica: < 3 meses.

1. **Arteriopatía periférica:**

- Isquemia arterial aguda: Emergente/Urgente.
- Isquemia arterial progresiva, con pérdida de tejido, gangrena húmeda o celulitis ascendente: Urgente.
- Fasciotomía por síndrome compartimental: Emergente/Urgente.
- Isquemia arterial crónica con dolor de reposo o trastornos tróficos: Urgente.
- Isquemia arterial crónica sin dolor de reposo ni trastornos tróficos: < 3 meses.
- Se considerará la amputación primaria en aquella patología que requiera reconstrucciones vasculares complejas que conlleven desbridamientos sucesivos y aumento de la estancia quirúrgica.

1. **Traumatismo vascular:**

- Traumatismo arterial o venoso con hemorragia y/o isquemia: Emergente/Urgente.

1. **Patología venosa:**

- Trombosis venosa profunda aguda ilio-femoral con flegmasía: Emergente/Urgente.
- Colocación de filtro de vena cava inferior: Urgente.
- Trombosis venosa profunda masiva ilio-femoral en paciente de bajo riesgo: Urgente.
- Tratamiento vascular de las úlceras venosas: < 6 meses.
- Síndrome de May Thurner asintomático: <3 meses.
- Retirada de filtro de vena cava inferior: < 3 meses.
- Venas varicosas, tratamiento quirúrgico o endovascular: < 9 meses (se recomienda valoración individualizada de cada paciente en función de su situación clínica e impotencia funcional).

1. **Heridas/Gangrena/Amputaciones:**

- Amputación de miembro inferior: Urgente.
- Amputación de miembro inferior con sepsis: Emergente/Urgente.
- Amputación menor por infección o necrosis: Urgente.
- Desbridamiento de infección o necrosis de herida quirúrgica: Urgente.
- Injertos cutáneos sobre heridas quirúrgicas: Urgente.

1. Vid. como orientación de procedimiento “INSTRUCCIÓN DE MEDICINA PREVENTIVA A LAS DIRECCIONES SOBRE LOS TRABAJADORES ESPECIALMENTE SENSIBLES (TES)”, sujetas a la modificación necesaria para su ajuste efectivo en cada uno de los centros hospitalarios.

   Mientras dure la epidemia de coronavirus se han tomado las siguientes determinaciones sobre TES:

   1. Embarazadas y lactantes hasta los 9 meses: Se les restringe cualquier actividad en el hospital, en todas las categorías profesionales. Se les debe indicar que acudan a Recursos Humanos directamente, para que tramiten su baja laboral.
   2. Trabajadores con tratamientos inmunosupresores e inmunodeficiencia graves: Se les restringe cualquier actividad asistencial:
      1. En el caso de personal sanitario se le indica NO APTO TEMPORAL.
      2. En el resto de categorías se pondrá APTO CON RESTRICCIONES: evitar actividad asistencial.
   3. Trabajadores con patologías más vulnerables a la infección por coronavirus: Se les restringe la actividad asistencial en las zonas de mayor riesgo: UCI, Urgencias y áreas de hospitalización dirigida a pacientes con coronavirus. El resto de las plantas sí son aptas aunque pueda diagnosticarse algún paciente positivo (siempre con EPI adecuado). En este caso, el trabajador hará una declaración responsable de pertenecer a grupo vulnerable frente a covid-19 que entregará a dirección.
      1. Se solicita a las distintas direcciones que reorganizen las plantillas según estos criterios, y en caso de duda con algún profesional, sea la propia dirección quien se ponga en contacto con Preventiva. Los grupos vulnerables que hay que tener en cuenta son:
   - Mayores de 60 años.
   - Enfermedad cardiovascular, incluida hipertensión.
   - Diabetes.
   - Enfermedad pulmonar crónica, incluida asma grave.
   - Enfermedad hepática crónica.
   - Enfermedad renal crónica.
   - Enfermedad neurológica o neuromuscular crónica.
   - VIH.
   - Cáncer en tratamiento.

   [↑](#footnote-ref-1)
2. La TC de Tórax presenta patrones radiológicos muy característicos y representativos de la infección por COVID-19, y puede ser una excelente alternativa en pacientes en los que no se puede el resultado del test de RT-PCR. Al igual que las otras pruebas diagnósticas puede tener falsos negativos, principalmente en los 2-3 primeros días. [↑](#footnote-ref-2)
3. La vía clínica del paciente quirúrgico, especialmente paciente COVID-19 (+), sintomático o de alta sospecha diagnóstica, seguirá las instrucciones contenidas en los planes de contingencia de bloque quirúrgico elaborado por la Dirección Médica de los distintos centros sanitarios. [↑](#footnote-ref-3)
4. La Sociedad Andaluza de Cirugía Cardiovascular comparte y apoya las recomendaciones que la Sociedad Española de Anestesiología, Reanimación y Terapéutica del Dolor (SEDAR) explicita en relación a la metodología de trabajo y protección del anestesiólogo durante los procedimientos de cirugía cardiovascualr. [↑](#footnote-ref-4)
5. Es imprescindible el entrenamiento con anterioridad en la colocación y retirada de los EPI. Para su utilización se seguirán las instrucciones específicas a tal efecto disponibles en los distintos centros sanitarios. [↑](#footnote-ref-5)
6. Sequence for putting on personal protective equipment (PPE) <https://www.cdc.gov/niosh/npptl/pdfs/PPE-Sequence-508.pdf> [↑](#footnote-ref-6)
7. Al menos deberán utilizarse mascarillas de capacidad de filtro FFP2/N95 o superior. La utilización de la mascarilla, colocación y retirada, así como la estrategia simultánea dirigida a la protección del paciente se realizará siguiendo las instrucciones disponibles en cada centro hospitalario. Es preferible la utilización de mascarillas sin válvula. En caso utilizar mascarillas con válvula se colocará una mascarilla quirúrgica por encima con objeto de evitar la transmisión hacia el paciente de patógenos. [↑](#footnote-ref-7)
8. La Sociedad Andaluza de Cirugía Cardiovascular comparte y apoya las recomendaciones que la Sociedad Española de Anestesiología, Reanimación y Terapéutica del Dolor (SEDAR) explicita en relación a la metodología de trabajo y protección del anestesiólogo durante los procedimientos de cirugía cardiovascualr. [↑](#footnote-ref-8)
9. Es imprescindible el entrenamiento con anterioridad en la colocación y retirada de los EPI. Para su utilización se seguirán las instrucciones específicas a tal efecto disponibles en los distintos centros sanitarios. [↑](#footnote-ref-9)
10. Sequence for putting on personal protective equipment (PPE) <https://www.cdc.gov/niosh/npptl/pdfs/PPE-Sequence-508.pdf> [↑](#footnote-ref-10)
11. Al menos deberán utilizarse mascarillas de capacidad de filtro FFP2/N95 o superior. La utilización de la mascarilla, colocación y retirada, así como la estrategia simultánea dirigida a la protección del paciente se realizará siguiendo las instrucciones disponibles en cada centro hospitalario. Es preferible la utilización de mascarillas sin válvula. En caso utilizar mascarillas con válvula se colocará una mascarilla quirúrgica por encima con objeto de evitar la transmisión hacia el paciente de patógenos. [↑](#footnote-ref-11)
12. Comisión Conjunta SEC y SECCE. Rev Esp Cardiol 2000; 53: 1373-1379.

    2 <https://www.boe.es/boe/dias/2020/03/14/pdfs/BOE-A-2020-3692.pdf> [↑](#footnote-ref-12)
13. Reducción del diámetro límite (45 mm./50 mm.) para indicar cirugía en función de la coexistencia de valvulopatía bicúspide, conectivopatías y factores de riesgo de ruptura/disección. Se seguirán las actuales guías de práctica clínica para disminuir el umbral límite en situaciones especiales: bicuspidismo, conectivopatías (Síndrome de Marfan, Ehlers-Danlos tipo IV, Loeys-Dietz, etc.) que precisarán una evaluación individualizada de cada paciente. [↑](#footnote-ref-13)
